# Supplementary material for: Regional association analysis-based fine mapping of three clustered QTL for verticillium wilt resistance in cotton (G. hirsutum. L)
Source: BMC Genomics. 2017 Aug 25;18:661. doi: 10.1186/s12864-017-4074-y (PMC6389109; doi:10.1186/s12864-017-4074-y)
Supplement: Supplementary file 11 — Comparison of VW resistance-associated SNPs with the genome region of interestand detection of functional genes related to VW resistance. (XLSX 18 kb) [file 12864_2017_4074_MOESM11_ESM.xlsx]

## Sheet: Table S8
SNP ID	Length	mRNA with significant alignment	Identitie	E value	chr.	Position(bp)	Homology	Genbank Accession	Blast score E-value
i16842Gh i16844Gh i26445Gh	202	CotAD_22101	0.97	2e-89	Dt_chr9	32047558-32051340	putative disease resistance protein	XM_016828618	0
		CotAD_22100	0.97	2e-89	Dt_chr9	32044685-32047012	putative disease resistance protein	XM_016828618	0
		CotAD_22103	0.95	2e-80	Dt_chr9	32088980-32092827	putative disease resistance RPP13-like protein 1	XM_012592388.1	0
i16842Gh i16844Gh	202	CotAD_22107	0.96	9e-88	Dt_chr9	32154134-32156005	putative disease resistance protein	XM_016828618	0
i16842Gh	202	CotAD_22075	0.83	2e-44	Dt_chr9	31613575-31617351	putative disease resistance protein	XM_016892886.1	0
i26445Gh	102	CotAD_22106	0.98	2e-42	Dt_chr9	32108806-32110932	putative disease resistance RPP13-like protein 1	XM_012592388.1	0
i09957Gh	202	CotAD_02500	0.98	2e-94	Dt_chr9	39454480-39458289	putative disease resistance RPP13-like protein 1	XM_016830773.1	0
i10014Gh	202	CotAD_57447	0.99	4e-101	Dt_chr9	34947394-34958972	LRR receptor-like serine/threonine-protein kinase	XM_016830453.1	0
		CotAD_08161	0.99	4e-96	Dt_chr9	37593304-37598658	LRR receptor-like serine/threonine-protein kinase	XR_001686195.1	0
		CotAD_08159	0.95	9e-83	Dt_chr9	37502100-37502951	LRR receptor-like serine/threonine-protein kinase	XM_012592136.1	0
i09569Gh	202	CotAD_13517	0.99	9e-98	Dt_chr9	51959076-51966950	probable serine/threonine protein kinase IRE4	XM_016896747.1	0
i09575Gh	202	CotAD_13522	0.99	4e-96	Dt_chr9	51931199-51933909	probable protein phosphatase 2C 55	XR_001686522.1	0
i06743Gh	202	CotAD_02600	0.99	6e-70	Dt_chr9	40729075-40731141	E3 ubiquitin-protein ligase	XM_016830883.1	0
i10740Gh	202	CotAD_60243	0.9	6e-40	Dt_chr9	48627658-48642563	E3 ubiquitin-protein ligase UPL2-like	XM_016831717.1	0
i05139Gh	202	CotAD_49594	0.84	1e-41	Dt_chr9	50048865-50052565	transcription factor VIP1-like	XM_016831840.1	0
i26015Gh	102	CotAD_63485	1	5e-08	Dt_chr9	51661453-51663931	putative transcription factor bHLH107	XM_016832019.1	0
i16657Gh	202	CotAD_09715	0.99	9e-98	Dt_chr9	57644258-57647007	transmembrane protein 87A-like	XM_016832900.1	0
	202	CotAD_59669	0.98	9e-93	Dt_chr9	43192739-43194577	transmembrane protein 87A-like	XM_016832900.1	0
i09567Gh	202	CotAD_13516	0.99	2e-99	Dt_chr9	51971536-51973620	uncharacterized membrane protein At1g75140-like	XM_016832059.1	0
i02943Gh	202	CotAD_18404	0.99	2e-64	Dt_chr9	51168144-51172225	probable glycosyltransferase	XM_016831986.1	0
i10058Gh	202	CotAD_22113	0.99	2e-98	Dt_chr9	32213515-32219767	TBC1 domain family member 8B-like	XM_012592404	0
i06750Gh		CotAD_02589	0.99	3e-73	Dt_chr9	40659417-40663881	DNA repair helicase XPB1-like	XM_012633274.1	0
i29267Gh	102	CotAD_22166	0.93	4e-23	Dt_chr9	33394093-33395574	Gossypium raimondii clone	AC243124.1	2e-75
i12373Gh	202	CotAD_08074	0.95	1e-56	Dt_chr9	36481171-36482298	ROOT PRIMORDIUM DEFECTIVE 1-like protein	XM_016830581.1	0
i19266Gh	202	CotAD_02584	0.99	4e-101	Dt_chr9	40626991-40628684	1-aminocyclopropane-1-carboxylate synthase-like	XM_016830868.1	0
i00366Gh	202	CotAD_02752	0.98	2e-65	Dt_chr9	41853061-41854577	40S ribosomal protein S20-2-like	XM_016831076.1	0
i02176Gh	202	CotAD_16802	0.99	4e-101	Dt_chr9	44538183-44539261	3'-N-debenzoyl-2'-deoxytaxol N-benzoyltransferase-like	XM_016831339.1	0
i09909Gh	202	CotAD_16735	0.98	1e-66	Dt_chr9	45415723-45421024	protein disulfide isomerase-like 5-2	XM_016831397.1	0
i00554Gh	202	CotAD_60247	0.99	4e-101	Dt_chr9	48668803-48686809	protein SABRE-like	XM_016831722.1	0
i09580Gh	202	CotAD_13528	0.99	9e-58	Dt_chr9	51905842-51907578	NAC domain-containing protein 76-like	XM_016832047.1	0
i09578Gh	202	CotAD_13523	0.99	3e-77	Dt_chr9	51925946-51929529	J domain-containing protein required for chloroplast accumulation response 1-like	XM_016832054.1	0
i09571Gh	202	CotAD_13518	0.99	6e-70	Dt_chr9	51950158-51952551	protein indeterminate-domain 2-like	XM_016832057.1	0
i09572Gh	202	CotAD_13518	0.99	2e-99	Dt_chr9	51950158-51952551	protein indeterminate-domain 2-like	XM_016832057.1	0
i09574Gh	202	CotAD_13521	0.99	3e-78	Dt_chr9	51935229-51937124	cytochrome P450 734A1-like	XM_016832058.1	0
i09565Gh	202	CotAD_13515	0.99	1e-91	Dt_chr9	51974771-51976814	outer envelope pore protein 24A, chloroplastic-like	XM_016832060.1	0
i16717Gh	202	CotAD_13515	0.98	4e-66	Dt_chr9	51974771-51976814	outer envelope pore protein 24A, chloroplastic-like	XM_016832060.1	0
i09564Gh	202	CotAD_13510	0.99	2e-65	Dt_chr9	52004860-52006864	glucan endo-1,3-beta-glucosidase 7-like	XM_016832064.1	0
i11139Gh	202	CotAD_46060	0.88	4e-61	Dt_chr9	55037127-55037867	VQ motif-containing protein 4-like	XM_016832541.1
i00538Gh	202	CotAD_08162	0.9	4e-37	Dt_chr9	37610824-37611593	uncharacterized	XM_016829102.1	0
		CotAD_60242	0.94	4e-32	Dt_chr9	48616990-48617484	uncharacterized	XM_012585039.1	0
		CotAD_18370	0.94	4e-32	Dt_chr9	50848940-50849891	uncharacterized	XR_001124010.1	0
		CotAD_18369	0.94	4e-32	Dt_chr9	50844034-50845081	uncharacterized	XR_001124010.1	0
i06739Gh	202	CotAD_02606	0.98	6e-80	Dt_chr9	40779281-40785243	uncharacterized	XM_016830891.1	0
i06664Gh	202	CotAD_02779	0.99	6e-75	Dt_chr9	42094488-42097379	uncharacterized	XM_016831110.1	0
i00156Gh	202	CotAD_16700	0.99	4e-101	Dt_chr9	45886787-45891072	uncharacterized	XM_016831430.1	0
